# Supplementary material for: Overexpression of PDGF-BB decreases colorectal and pancreatic cancer growth by increasing tumor pericyte content
Source: JCI journal article supplement (doi:10.1172/jci31334), 2007-07-20
Supplement: sd1 [file 1]

## **Supplemental Movie Legend**

### **Effect of PDGF-BB overexpression on tumor pericyte content.**

Tumors derived from HT-29 Neo (control) and PDGF-B overexpressing tumors (HT-29 S2) tumors were stained for endothelial cells (CD31; blue), pericytes (desmin; red) and nuclei (Hoescht 33342; green). Tumors derived from PDGF-B overexpressing cells (PDGF-BB Confocal.avi) demonstrated increased pericyte content when compared to control tumors (Control confocal.avi).
